1 - Research article -

2 **Community knowledge, attitudes and practices related to**  
3 ***Taenia solium* taeniosis and cysticercosis in Zambia**

4 Short title: knowledge, attitudes and practices related to *Taenia solium*  
5 infections in Zambia

6 Gideon Zulu <sup>1,2\*</sup>, Kabemba E. Mwape <sup>2</sup>, Tamara M. Welte <sup>3,4</sup>, Martin Simunza <sup>5</sup>, Alex Hachangu<sup>2</sup>,  
7 Wilbroad Mutale<sup>6</sup>, Mwelwa Chembensofu <sup>7</sup>, Chummy Sikasunge <sup>7</sup>, Isaac K. Phiri <sup>2#</sup> and Andrea  
8 S. Winkler <sup>3,8#</sup>

9 \* Corresponding author

10 E-mail: [gideonzulu@yahoo.com](mailto:gideonzulu@yahoo.com) (GZ)

11 # These authors contributed equally to this work.

12 1. Ministry of Health, Government of the Republic of Zambia.

13 2. Department of Clinical Studies, School of Veterinary Medicine, University of Zambia, Lusaka,  
14 Zambia.

15 3. Department of Neurology, Center for Global Health, Faculty of Medicine, Technical University  
16 of Munich, Munich, Germany.

17 4. Epilepsy Center, Department of Neurology, University Hospital Erlangen, Erlangen, Germany.

18 5. Department of Disease Control, School of Veterinary Medicine, University of Zambia, Lusaka,  
19 Zambia.

20 6. Department of Public Health, School of Medicine, University of Zambia, Lusaka, Zambia.

21 7. Department of Para-clinical Studies, School of Veterinary Medicine, University of Zambia,  
22 Lusaka, Zambia.

23 8. Department of Community Medicine and Global Health, Institute of Health and Society, Faculty  
24 of Medicine, University of Oslo, Oslo, Norway.

## 25 **Abstract**

26 **Background:** Several studies on *Taenia solium* taeniosis / cysticercosis (TSTC) have been  
27 conducted in Zambia. However, none has assessed community knowledge, attitudes and practices  
28 related to TSTC and epilepsy.

29 **Methods:** A community-based cross-sectional study was conducted between November and  
30 December 2022. The design consisted of a questionnaire-based survey conducted in each of the  
31 25 purposely selected villages in Chiparamba Rural Health Centre (RHC) catchment area in  
32 Chipata district of the Eastern Province.

33 **Results:** A total of 588 participants comprising 259 (44%) males and 329 (56%) females with  
34 median age of 42 years (range 17 to 92 years) were interviewed. Awareness of the signs and  
35 symptoms of taeniosis and human cysticercosis (HCC), including transmission and prevention  
36 measures was very low. Whilst the majority had heard about epilepsy, they were not able to link  
37 HCC to epilepsy. Most participants were aware of cysticerci in pigs (PCC) including its  
38 predilection sites but were not aware of mode of transmission and prevention measures. The pork  
39 meat inspection by trained professionals was also not a common practice in the area. Risk  
40 perception of *T. solium* infections was thus very low. Overall knowledge, attitude and practice

41 scores related to *T. solium* infections and to epilepsy were very low with median scores of 0.38  
42 (IQR 0.25 - 0.54) for knowledge, 0.25 (0.25 - 0.50) for attitudes, and 0.31 (0.25 - 0.44) for  
43 practices. Males had better knowledge on TSTC (median = 0.42,  $p = 0.017$ ,  $r = 0.098$ ) and better  
44 practice scores (median = 0.38,  $p = < 0.001$ ,  $r = 0.154$ ) compared to females though the effect size  
45 was small. With regards to sanitation and hygiene washing with soap and water was reported by  
46 many but only few had a hand washing facility near their latrines.

47 **Conclusion:** The study shows overall poor knowledge, attitudes and practices related to TSTC  
48 among the community of Chiparamba RHC in Chipata district of the Eastern Province of Zambia.  
49 This poses a serious challenge for control and elimination of *T. solium* infections and thus efforts  
50 to improve knowledge, attitudes and practices should be made using a One Health approach for  
51 the control and elimination of TSTC. Educational programs about TSTC transmission, signs and  
52 symptoms, prevention, management and control need to be scaled up in the study area and Zambia  
53 as a whole.

54 **Keywords:** Knowledge, Attitudes, Practices, *Taenia solium*, Taeniosis, Cysticercosis, Epilepsy.

## 55 **Author summary**

56 *Taenia solium* taeniosis / cysticercosis (TSTC) is endemic in Zambia. We aimed at assessing  
57 knowledge, attitudes and practices (KAP) related to TSTC and epilepsy in a community setting in  
58 Chiparamba area of Chipata district of the Eastern Province of Zambia. Understanding KAP is  
59 important in designing and implementing public health interventions for control and eradication  
60 of TSTC in a community. We found generally poor KAP related to TSTC among the community  
61 in our study area. This lack of knowledge about TSTC infections can lead to behaviours that  
62 facilitate the transmission and maintenance of *T. solium* infections and could hinder efforts to  
63 control the most preventable cause of epilepsy in the sub-Saharan African region. More efforts to  
64 improve KAP using a One Health approach for the control and elimination of TSTC are therefore  
65 required in Zambia.

## 66 **Introduction**

67 *Taenia solium* is a neglected zoonotic tapeworm causing taeniosis in humans and cysticercosis in  
68 pigs and humans. Taeniosis, which is the presence of an adult tapeworm within the human  
69 intestine, occurs when one ingests undercooked pork infected with *T. solium* cysticerci. The adult  
70 worm develops and sheds mature proglottids containing thousands of eggs through the faeces of a  
71 *T. solium* carrying individual (definitive host). Pigs through their coprophagic nature get infected  
72 with *T. solium* by consuming the infected faeces from a *T. solium* carrying individual. Once the  
73 eggs are ingested by pigs, they hatch into oncospheres in the intestines and migrate to the muscle  
74 and other tissues within the pig causing porcine cysticercosis (PCC) (intermediate host) and thus  
75 completing the life cycle. Humans can also develop cysticercosis (HCC) if they ingest *T. solium*  
76 eggs through autoinfection (for a tapeworm carrier) or through contaminated water or food (faecal-

77 oral). The larvae migrate through the circulatory system to various tissues causing cysticercosis,  
78 but if they lodge in the central nervous system (CNS), then neurocysticercosis (NCC) may occur  
79 (1). Taeniosis is mostly asymptomatic but signs / symptoms vary from abdominal discomfort,  
80 vomiting and the passage of visible tapeworm proglottids in stool. Cysticercosis is difficult to  
81 diagnose but may show subcutaneous nodules for those with cysticerci in the subcutaneous tissues  
82 (2,3). NCC may also remain asymptomatic but some present with severe progressive headache,  
83 and / or epileptic seizures, sometimes also with focal neurological signs / symptoms (4). *T. solium*  
84 is among the list of foodborne zoonotic parasites causing considerable morbidity and mortality and  
85 is the leading cause of epilepsy and other neurological sequelae in *T. solium* endemic populations  
86 across sub-Saharan Africa (5–7).

87 In many low-income and middle-income countries (LMICs), *T. solium* cysticercosis is a neglected  
88 zoonotic disease in humans and pigs and is underreported (8). *T. solium* taeniosis / cysticercosis  
89 (TSTC) has significant public health and economic impacts, although the exact impact is difficult  
90 to determine due to lack of meat inspection to detect the cysts, backyard slaughter of pigs, lack of  
91 affordable diagnostic tools in humans and stigma related to NCC in endemic areas (9–11). *T.*  
92 *solium* cysticercosis prevention and control measures require a good understanding about the  
93 transmission dynamics and the factors that perpetuate its presence in the communities.

94 In Zambia, a number of studies on *T. solium* infections have been conducted (12,13). These include  
95 studies assessing community perceptions on the use of latrines (14,15), pig management practices  
96 (16) and an assessment of acceptability of control measures for *T. solium* infections (16). However,  
97 no study has assessed community understanding of the relationship between taeniosis,  
98 cysticercosis (in pigs and humans) and NCC as well as NCC and epilepsy. This study aimed at

99 assessing the knowledge, attitudes and practices (KAP) related to TSTC and NCC in Chipata  
100 district in Eastern Province of Zambia.

101 The study was done according to the strobe checklist (S1 Table).

## 102 **Materials and Methods**

### 103 **Ethics**

104 Ethical clearance was obtained from ERES CONVERGE Institutional Review Board (IRB),  
105 reference number 2018-March-002. Approval was also obtained from the Zambia National Health  
106 Research Authority (ZNHRA). All participants were informed about all aspects of the study before  
107 inclusion, and all signed an informed consent.

108 The reporting of this study followed the STROBE checklist (S1 Table).

### 109 **Study area**

110 The study was conducted in Chipata district in the Eastern Province of Zambia within the  
111 Chiparamba Rural Health Centre (RHC) catchment area with 25 selected villages. The RHC has a  
112 catchment population of 17,881 (clinic head count). The main economic activity for the people in  
113 this area is subsistence farming especially growing maize and groundnuts for home consumption.  
114 The community keeps pigs, goats and chickens as their main livestock. The main ethno-linguistic  
115 group of the area are the Chewas and Ngonis. The Chewas being of a matrilineal descent while the  
116 Ngonis are of a patrilineal descent. The area was selected because it is well known to the  
117 researchers for practicing free-range pig keeping, low levels of sanitation and a high number of  
118 epilepsy patients reporting to health facilities within the district, as well as its proximity to a

119 neighbouring Katete district with high *T. solium* cysticercosis prevalence in pigs and humans  
120 (18,19)

## 121 **Study design**

122 This study forms part of a larger study (CYSTINET-Africa) related to the occurrence and detection  
123 of human *T. solium* infections in the Eastern Province of Zambia. A community-based cross-  
124 sectional study was conducted between November and December 2022. The design consisted of a  
125 questionnaire-based survey conducted in each of the 25 purposely selected villages in Chiparamba  
126 RHC catchment area. A list of all households was available from an ongoing study about *T. solium*  
127 in the district. The households were randomly selected from each village. In each of the selected  
128 households, the interviews were conducted with the head of the household and in case the head  
129 was absent, another adult household member was interviewed.

130 To ensure that correct information was obtained when referring to a “tapeworm” and “cysticerci”  
131 and to reduce the possibility of confusing these with other parasites, a colour picture of an adult  
132 tapeworm and another of pork infested with cysticerci were shown to the respondents during the  
133 interview (S1 File: S1 Fig).

## 134 **Sample size determination**

135 The sample size calculation was performed using the formula for qualitative variables with an  
136 infinite population (20). Admitting no previous knowledge about TSTC in the study population ( $p$   
137 = 0.5), with a significance level of 95% ( $Z_{\alpha/2} = 1.96$ ) and a margin error of 5%, the minimum  
138 sample size calculated was 384. A total number of 588 households, originating from 25 villages  
139 of Chiparamba RHC catchment area, were included to cater for non-response and 50%  
140 representation from each of the randomly selected villages.

## 141 **Questionnaire survey**

142 We adopted a questionnaire which was validated and used in Tanzania for a similar study (21).  
143 The questionnaire underwent a validation process by a team of experts (ASW, IKP, KEM, TW  
144 and WM) regarding objectivity, clarity and relevance. Before data collection, content validity of  
145 the questionnaire was discussed among these experts to assess conformity of the questionnaire to  
146 the study objective and to obtain consensus. Face validity was assessed by piloting the  
147 questionnaire on ten respondents from a non-participating village within the RHC catchment area  
148 to assess understanding of the questions and whether they were easy to follow. The questions were  
149 phrased according to the local circumstances and face-to-face interviews were used to administer  
150 the questionnaire to each of the selected household members by a team comprising six  
151 investigators conversant in the local language (Nsenga) common to both the Chewa and the Ngoni  
152 people. The questionnaire contained 87 questions altogether (S2 File) divided into eight sections.  
153 Section one comprised six questions on general information (date of interview, district name, name  
154 of village and household number, names of household head and interviewer). Section two of the  
155 questionnaire had seven questions about personal information of the respondent. Section three  
156 comprised thirteen questions about drinking water and sanitation. Section four comprised nine  
157 questions regarding human tapeworm infection. Section five comprised twelve questions  
158 regarding HCC infection which also included questions regarding NCC. Section six comprised ten  
159 questions regarding information on pork consumption and management. Section seven comprised  
160 thirteen questions regarding PCC and section eight comprised seventeen questions regarding  
161 knowledge, attitudes and perceptions related to epilepsy. The presence and quality of toilets,  
162 presence of hand washing facilities inside or outside the latrines, presence of a dish rack and pig  
163 management systems (confinement, tethering, or free-range) were assessed through direct



164 observations. All interviews were conducted in Nsenga the local language in the Chiparamba area  
165 of Chipata district.

## 166 **Data collection**

167 Data was collected using KoboCollect, an application for data collection installed on tablets (22).  
168 The investigators were trained on the use of the KoboCollect tool before commencement of the  
169 study and the feasibility and correctness of the items in the electronic questionnaire was also pre-  
170 tested.

## 171 **Study variables**

172 The terms knowledge, attitudes and practices were defined according to Badran (23). Within the  
173 context of our study knowledge refers to the capacity to acquire and retain information about *T.*  
174 *solium* infections (*T. solium* taeniosis, HCC, NCC and PCC) and epilepsy. Attitude refers to  
175 inclinations to react in a certain way towards *T. solium* infections including epilepsy and by  
176 practice we mean the application of rules and knowledge that leads to actions regarding *T. solium*  
177 infections and epilepsy. Participants that had heard about *T. solium* infections and epilepsy were  
178 described as “being aware” of these conditions. Within the aspects of KAP, a minimum score of 0  
179 points and a maximum score of 1 point was allocated to each question in the questionnaire. In  
180 questions with more than one correct alternative, scores were considered proportional to the  
181 number of correct answers. Final KAP scores were defined as the arithmetic mean of the scores  
182 within each section of the KAP, i.e. knowledge, attitudes and practices separately per individual.  
183 The scores were thus represented by quantitative variables (dependent), described within the  
184 closed interval between 0 and 1, where the higher the score value, the higher the evaluation of the  
185 respondent’s KAP.

## 186 **Statistical analysis**

187 Data were stored in a Microsoft Excel 2016 database (Microsoft Corporation; Redmond, WA,  
188 EUA) where scores of each component were calculated. Later, statistical analyses were performed  
189 using IBM SPSS Statistics (Version 23). Absolute and relative (%) frequencies were calculated  
190 for descriptive analyses of the independent variables. For the dependent variables in the descriptive  
191 analysis, median, interquartile range, and minimum and maximum values were calculated. The  
192 non-parametric Mann-Whitney-U and Kruskal-Wallis tests were performed to determine  
193 associations of the scores with independent variables (24). The effect size (r-statistic), was  
194 calculated and values between 0.1 and 0.3 were classified as a small effect, between 0.3 and 0.5  
195 were classified as a moderate effect and greater than or equal to 0.5 were classified as a large effect  
196 (25). To evaluate the relationship between the scores, Spearman correlation was applied, and a  
197 Kruskal-Wallis test was used to compare the scores (24). Associations between categorical  
198 variables were assessed using the Chi-square test and a *p*-value less or equal to 0.05 was considered  
199 to be significant.

## 200 **Results**

201 In total, 588 interviews from distinct households were conducted. The study included 259 (44%)  
202 male and 329 (56%) female participants. The age ranged from 17 to 92 years (median 42 years)  
203 with the majority being older than 30 years. Fig 1 shows the age distribution of the respondents  
204 indicating that a good number (35%) was above fifty (50) years of age.

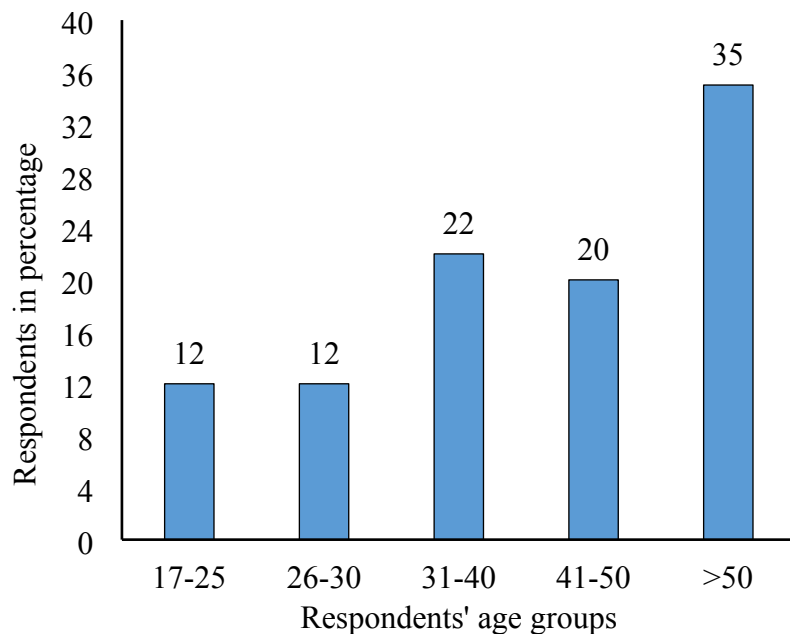

205

206 **Fig 1. Age group classification of respondents (N = 588) of Chiparamba in Chipata district.**

207 Most of the participants were of the Christian faith, predominantly Catholic and Protestant with  
208 only 28 (5%) comprising participants of the Muslim faith, as shown in Table 1. Farming was the  
209 main occupation (557, 95%) as well as the main source of income for most households (547, 93%).  
210 On education, the majority of respondents (364, 62%) only went up to primary level with 132  
211 (22%) having some secondary education (Table 1).

212

213

214

215

216

217

218 **Table 1. Social demographic characteristics of participants (N = 588) of Chiparamba in**  
 219 **Chipata district.**

| Variable              |                   | Number (n) | Percent (%) |
|-----------------------|-------------------|------------|-------------|
| Sex                   | Male              | 259        | 44          |
|                       | Female            | 329        | 56          |
| Age (years)           | 17-25             | 69         | 12          |
|                       | 26-30             | 69         | 12          |
|                       | 31-40             | 131        | 22          |
|                       | 41-50             | 115        | 20          |
|                       | >50               | 204        | 35          |
| Religion              | Catholic          | 178        | 30          |
|                       | Protestant        | 337        | 57          |
|                       | Adventist         | 4          | 1           |
|                       | Muslim            | 28         | 5           |
|                       | Other             | 41         | 7           |
| Main occupation       | Farmer            | 557        | 95          |
|                       | None              | 6          | 1           |
|                       | Other             | 25         | 4           |
| Level of education    | None              | 91         | 15          |
|                       | Primary school    | 364        | 62          |
|                       | Secondary school  | 132        | 22          |
|                       | Tertiary          | 1          | 0           |
| Main source of income | Farming           | 547        | 93          |
|                       | Business          | 28         | 5           |
|                       | Formal employment | 1          | 0           |
|                       | Other             | 12         | 2           |
| Main occupation       | Farmer            | 557        | 95          |
|                       | None              | 6          | 1           |
|                       | Other             | 25         | 4           |

220 Sixty percent (351) of participants interviewed had heard about pork tapeworm infection in  
 221 humans (*T. solium* taeniosis) and about half of these (163, 46%) first learned about it through  
 222 community sensitization conducted before the start of the study, while 30% (107) heard about it  
 223 from hospital staff (S1 File: S1 Table). Table 2 describes knowledge among participants that had

224 heard (were aware) about *T. solium* taeniosis, HCC / NCC, PCC and epilepsy. Only 40% (141) of  
225 those who had heard about tapeworm infection were knowledgeable about the signs and symptoms  
226 of taeniosis. Knowledge about tapeworm transmission and prevention was equally low with only  
227 16% (57) of participants being aware of infection through eating infected pork and 39% (138)  
228 giving correct responses about prevention. The majority of the participants (98, 28%) wrongly  
229 thought tapeworm was acquired from eating contaminated food (S1 File: S1 Table). Fifty-seven  
230 percent (334) of the respondents had heard about HCC but only 1% (4) of these were aware of the  
231 transmission through consumption of *T. solium* eggs. Similarly, only 6% (21) were aware of  
232 prevention of HCC. Most participants (215, 64%) were aware of the location of HCC lesions but  
233 knowledge regarding HCC and NCC signs / symptoms was low with only 28% (94) and 39% (131)  
234 of participants giving correct responses for HCC and NCC signs / symptoms respectively (Table  
235 2, S1 File: S2 Table).

236 Most of the participants (411, 70%) knew about cysticerci in pigs (PCC) with 91% (376) of them  
237 correctly identifying the location of cysts in muscles and under the tongue. However, knowledge  
238 regarding transmission of PCC was very low with only 16% (64) of those aware of PCC being  
239 knowledgeable on how pigs acquire cysticerci. Thirty-four percent (59) of those that said they  
240 knew how pigs acquired cysticerci believed that PCC was due to feeding of pigs with “gaga” the  
241 remains of maize bran that is used to make local beer (S1 File: S3 Table). Only few participants  
242 knew the transmission of PCC, consequently knowledge on prevention of PCC was very low with  
243 only 44% (179) giving the correct responses (Table 2).

244 The majority of the participants (566, 96%) had heard about epilepsy (Table 2) with 58% (328)  
245 knowing someone in the village who had epilepsy. However, very few (45, 8%) knew the  
246 association between epilepsy and HCC / NCC (S1 File: S4 Table).

247 **Table 2. Participant`s knowledge related to *T. solium* taeniosis / cysticercosis, porcine**  
 248 **cysticercosis and epilepsy (n = 588).**

| <b>Description</b>                                  | <b>Number (n)</b> | <b>Percent (%)</b> |
|-----------------------------------------------------|-------------------|--------------------|
| <b><i>Awareness of pork tapeworm in humans*</i></b> | <b>351</b>        | <b>60</b>          |
| Signs of infection                                  | 141               | 40                 |
| Transmission of tapeworm                            | 57                | 16                 |
| Tapeworm prevention                                 | 138               | 39                 |
| <b><i>Awareness of human cysticercosis *</i></b>    | <b>334</b>        | <b>57</b>          |
| Cysticercosis transmission                          | 4                 | 1                  |
| Locations for cysticercosis lesions                 | 215               | 64                 |
| Symptoms of cysticercosis                           | 94                | 28                 |
| Signs of neurocysticercosis                         | 131               | 39                 |
| Prevention of cysticercosis                         | 21                | 6                  |
| <b><i>Awareness of porcine cysticercosis*</i></b>   | <b>411</b>        | <b>70</b>          |
| Location of cysts in pigs                           | 376               | 91                 |
| Transmission of porcine cysticercosis               | 64                | 16                 |
| Prevention of porcine cysticercosis                 | 179               | 44                 |
| <b><i>Awareness of epilepsy in humans</i></b>       | <b>566</b>        | <b>96</b>          |
| Linkage of epilepsy to human cysticercosis          | 45                | 8                  |

249 \*Responses within the groups are not mutually exclusive

250 Risk perception of *T. solium* tapeworm infection and cysticercosis was very low with only 39%  
 251 (136) and 35% (116) believing that they were at risk of taeniosis and cysticercosis respectively  
 252 (Table 3, S1 File: S5 Table). Regarding attitudes towards *T. solium* taeniosis prevention, most  
 253 participants regarded pork infected with cysticerci as bad meat with 94% (385) reporting that they  
 254 would not eat infected pork, 87% saying they would not sell the pork and 91% saying they would  
 255 discard the infected pork (Table 3, S1 File: S5 Table). On assessment of attitudes towards epilepsy,  
 256 the majority of participants (510, 90%) considered epilepsy a very serious disease and correctly

257 indicated that people with epilepsy (PWE) should go to hospital for medical help. Similarly, most  
258 participants had correct attitude regarding where to seek help if one had tapeworm infection or  
259 HCC (Table 3).

260 Regarding practices and with respect to pig keeping, only 17% (98) of the participants kept pigs  
261 and 55% (54) of these raised their pigs through free-range method, 28% (27) permanently housed  
262 their pigs and 17% (17) housed them at night (Table 3). Of all participants interviewed, only 18 %  
263 (108) had slaughtered a pig at home and among these, only 10% (11) had their meat inspected.  
264 The majority (65, 67%) reported that there was no need for inspection of the meat while 22% (21)  
265 said there were no inspectors to conduct the inspection of the slaughtered pigs (S1 File: S6 Table).  
266 Seventy-one percent (420) of the participants consumed pork meat and 95% (400) of these  
267 preferred their meat prepared by boiling. Eighty-eight percent (517) of the participants had seen  
268 cysticerci in pork meat before and 37% (191) of them reported that the contaminated meat which  
269 they saw was sold, 20% (101) reported that it was eaten and 39% (202) reported that the meat was  
270 returned to the owner (S1 File: S6 Table).

271 Regarding sanitation and hygiene, the majority of the participants (550, 94%) got their drinking  
272 water from boreholes and most of them (542, 92%) did not treat their drinking water. Whilst most  
273 participants (419, 71%) reported washing their hands after using the toilet, only 52% (305) of these  
274 used water with soap or ash (Table 3, S1 File: S7 Table).

275

276

277

278

279 **Table 3. Attitudes and practices regarding *T. solium* taeniosis / cysticercosis, porcine**  
 280 **cysticercosis and epilepsy.**

| <b>Factor</b>                                                               | <b>Number (n)</b> | <b>Percent (%)</b> |
|-----------------------------------------------------------------------------|-------------------|--------------------|
| <b><i>Risk perception of human tapeworm infections (n = 351) *</i></b>      |                   |                    |
| Believe they are at risk of infection with tapeworm                         | 136               | 39                 |
| Would go to hospital if had tapeworm infection                              | 348               | 99                 |
| <b><i>Risk perception of human cysticercosis infections (n = 334) *</i></b> |                   |                    |
| Believe they are at risk of cysticerci infection                            | 116               | 35                 |
| Would go to hospital if had human cysticercosis                             | 314               | 94                 |
| <b><i>Attitudes towards infected pork (n = 411) *</i></b>                   |                   |                    |
| Would sell pork with cysts                                                  | 52                | 13                 |
| Would eat pork with cysts                                                   | 26                | 6                  |
| Would discard pork with cysts                                               | 374               | 91                 |
| <b><i>Attitudes regarding human epilepsy (n = 566) *</i></b>                |                   |                    |
| Considers epilepsy to be a serious disease                                  | 510               | 90                 |
| Would go to hospital if one has epilepsy                                    | 560               | 99                 |
| <b><i>Pig rearing practices (n = 588)</i></b>                               |                   |                    |
| Keeps pigs                                                                  | 98                | 17                 |
| <i>Free-range pig rearing practice</i>                                      | 54                | 55                 |
| <i>Permanently housed pigs</i>                                              | 27                | 28                 |
| <i>Pigs housed at night only</i>                                            | 17                | 17                 |
| <b><i>Pig slaughtering practices (n = 588)</i></b>                          |                   |                    |
| Slaughtered pig at home                                                     | 108               | 18                 |
| <i>Meat inspected after slaughter</i>                                       | 11                | 10                 |
| <b><i>Pork consumption practices (n = 588)</i></b>                          |                   |                    |
| Eats pork meat                                                              | 420               | 71                 |
| <i>Cook by boiling the pork meat</i>                                        | 400               | 95                 |
| <b><i>Sanitation and hygiene practices (n = 588)*</i></b>                   |                   |                    |
| Treat drinking water                                                        | 46                | 8                  |
| Always wash hands after using the toilet                                    | 419               | 71                 |
| Wash hands using water with soap or ash                                     | 305               | 52                 |



281 \*Responses within factors are not mutually exclusive

## 282 **Analysis of KAP scores**

283 Analysing the KAP scores related to TSTC and epilepsy, it was observed that overall, all the scores  
284 were low. The knowledge variable obtained the highest score, whereas attitude had the lowest.  
285 When comparing the knowledge and practice scores, the two variables had a significant difference  
286 ( $p < 0.001$ ) between them, with good knowledge scores being higher than the corresponding  
287 practice scores (Table 4).

288 **Table 4. Scores for knowledge, attitudes and practices regarding *T. solium* taeniosis and**  
289 **cysticercosis of participants from Chiparamba in Chipata district.**

|                  | Spearman's rho |         |         | KAP scores |             |      |      |
|------------------|----------------|---------|---------|------------|-------------|------|------|
|                  | K              | A       | P       | MD         | IQR         | Min  | Max  |
| <b>Knowledge</b> | 1.000          | 0.492** | 0.223** | 0.38       | 0.25 - 0.54 | 0.00 | 0.83 |
| <b>Attitude</b>  | 0.492**        | 1.000   | 0.243** | 0.25       | 0.25 - 0.50 | 0.00 | 1.00 |
| <b>Practice</b>  | 0.223**        | 0.243** | 1.000   | 0.31       | 0.25 - 0.44 | 0.00 | 0.69 |

290 K, Knowledge; A, Attitudes; P, Practices; MD, median score; IQR, Interquartile range; Min,  
291 Minimum score, Max, Maximum score

292 \*\* Correlation is significant at the 0.01 level (2-tailed).

293 The overall descriptive analysis of knowledge, attitude and practice scores showed that among the  
294 three components, the knowledge score (MD = 0.38) was higher than the attitude (MD = 0.25) and  
295 practice scores (MD = 0.31). Both comparisons were significantly different ( $p < 0.001$ ). There was  
296 also a significant difference with a lower score for attitude when compared to the other variables  
297 (Table 4). The Spearman correlation between knowledge and attitude scores ( $r = 0.492$ ;  $p < 0.001$ )  
298 was positive and significant, indicating that the higher the knowledge score, the higher the attitude

299 score. The correlation coefficient between knowledge and practice scores ( $r = 0.223$ ;  $p < 0.001$ )  
300 was also positive and significant, showing that the higher the knowledge score, the better the  
301 practice. Regarding the correlation between attitude and practice scores ( $r = 0.243$ ;  $p < 0.001$ ), it  
302 was positive and significant, indicating that the higher the attitude score, the better the practice  
303 score (Table 4).

304 Considering the association of KAP scores with the socio-demographic factors it was found that  
305 regarding the knowledge component, there was no statistically significant difference in knowledge  
306 on TSTC across the various age groups ( $p = 0.977$ ). Neither was there any statistically significant  
307 difference in knowledge by religion ( $p = 0.059$ ) or level of education ( $p = 0.160$ ). However, it was  
308 observed that males had better knowledge on TSTC than females, though the effect size for this  
309 difference was small (MD = 0.42,  $p = 0.017$ ,  $r = 0.098$ ) (Table 5, S1 File: S8 Table). Regarding  
310 the attitude's component, there was no statistically significant difference in attitudes towards  
311 TSTC within the variables age group ( $p = 0.698$ ), sex ( $p = 0.112$ ), religion ( $p = 0.177$ ), and level  
312 of education ( $p = 0.88$ ). Within the practice component, males had better practice scores than  
313 females, though the effect size was also small (MD = 0.38,  $p = < 0.001$ ,  $r = 0.154$ ). There was no  
314 statistically significant difference in practices between the various age categories ( $p = 0.267$ )  
315 though there was a tendency of better practices among the age group 17 - 24 years (MD = 0.38).  
316 Similarly, no statistically significant difference was observed in practices based on religion ( $p =$   
317  $0.774$ ) or level of education ( $p = 0.326$ ) however, Catholics had better practices (MD = 0.38)  
318 compared to the other religions (Table 5).

319



320 **Table 5. Association of KAP scores with socio-demographic factors.**

| Characteristic     | Knowledge  |      |                 |               | Attitude |      |                 |        | Practice |      |                    |       |
|--------------------|------------|------|-----------------|---------------|----------|------|-----------------|--------|----------|------|--------------------|-------|
|                    | MD         | IQR  | <i>p</i> -value | ES            | MD       | IQR  | <i>p</i> -value | ES     | MD       | IQR  | <i>p</i> -value    | ES    |
| <b>Age (years)</b> | 17-25      | 0.38 | 0.79            | 0.977*        | 0.25     | 1.00 | 0.698*          |        | 0.38     | 0.63 | 0.267*             |       |
|                    | 26-30      | 0.33 | 0.71            |               | 0.25     | 0.75 |                 |        | 0.31     | 0.63 |                    |       |
|                    | 31-40      | 0.38 | 0.75            |               | 0.25     | 1.00 |                 |        | 0.31     | 0.57 |                    |       |
|                    | 41-50      | 0.38 | 0.83            |               | 0.25     | 1.00 |                 |        | 0.31     | 0.56 |                    |       |
|                    | >50        | 0.38 | 0.83            |               | 0.25     | 0.75 |                 |        | 0.31     | 0.69 |                    |       |
| <b>Sex</b>         | Male       | 0.42 | 0.83            | <b>0.017#</b> | 0.098    | 0.25 | 1.00            | 0.112# | 0.38     | 0.69 | <b>&lt; 0.001#</b> | 0.154 |
|                    | Female     | 0.33 | 0.83            |               |          | 0.25 | 1.00            |        | 0.31     | 0.69 |                    |       |
| <b>Religion</b>    | Catholic   | 0.38 | 0.75            | 0.059*        |          | 0.25 | 1.00            | 0.177* | 0.38     | 0.63 | 0.774*             |       |
|                    | Protestant | 0.38 | 0.83            |               |          | 0.25 | 1.00            |        | 0.31     | 0.69 |                    |       |
|                    | Adventist  | 0.30 | 0.33            |               |          | 0.25 | 0.25            |        | 0.31     | 0.31 |                    |       |
|                    | Muslim     | 0.29 | 0.75            |               |          | 0.25 | 0.75            |        | 0.31     | 0.50 |                    |       |
|                    | Other      | 0.29 | 0.71            |               |          | 0.25 | 1.00            |        | 0.31     | 0.63 |                    |       |
| <b>Education</b>   | None       | 0.38 | 0.71            | 0.160*        |          | 0.25 | 0.75            | 0.880* | 0.31     | 0.63 | 0.326*             |       |
|                    | Primary    | 0.38 | 0.83            |               |          | 0.25 | 1.00            |        | 0.38     | 0.69 |                    |       |
|                    | Secondary  | 0.33 | 0.75            |               |          | 0.25 | 1.00            |        | 0.31     | 0.63 |                    |       |
|                    | Tertiary   | 0.71 | 0.00            |               |          | 0.25 | 0.00            |        | 0.38     | 0.00 |                    |       |

321 ES, Effect size (0.1 = Small ES, 0.3 = Medium ES, 0.5 = Large ES); MD, Median score; IQR, Interquartile range.

322 \**p*-values based on Kruskal-Wallis test; #*p*-values based on Mann-Whitney-U test .

## 323 **Discussion**

324 This study conducted in the Eastern Province of Zambia, an area endemic for *T. solium* infections,  
325 showed that analyses of KAP was important to determine the vulnerabilities that surround  
326 knowledge, attitudes and practices of the population regarding this disease of public health  
327 importance.

328 Our findings indicate that the majority of the respondents do not have adequate knowledge about  
329 *T. solium* presence in their communities, signs / symptoms of TSTC, infection transmission,  
330 prevention and control. With the increase in pig farming in the region this lack of knowledge could  
331 lead to further increase of TSTC infections as the community is already exposed. The low  
332 knowledge levels about tapeworm infection amongst the community also calls for reinforcement  
333 of public health campaigns for the prevention and control of TSTC in the communities. About  
334 40% of respondents in the community reported that they did not know about tapeworm infection  
335 in humans. These need to be enlightened about *T. solium* taeniosis through health education  
336 programs, as pork consumption was also high within the area and most of the slaughtered pigs  
337 were not inspected by veterinary officials. The lack of knowledge regarding transmission of TSTC  
338 in man and pigs could contribute to perpetuation of the tapeworm life cycle as knowledge about  
339 prevention was equally low. Furthermore, most of the respondents interviewed only attended  
340 primary education with an additional 15% not having attended any formal education. Thus,  
341 information on TSTC obtained through literature and formal education would be very low. A low  
342 level of education among rural communities has been known to increase the risk of *T. solium*  
343 infections and prevalence of NCC (26).

344 Regarding PCC, the majority of respondents reported having seen cysts (masese) in pork. Despite  
345 most of them (70%, 411) reporting knowing what cysts are, they could only describe how cysts  
346 looked like in pork meat mostly as “white watery things” or “small blisters in pork meat.” Most  
347 participants were also aware of the locations of *T. solium* cysticerci in the infected pigs with under  
348 the tongue and in muscles being the most commonly mentioned sites. When pig traders sell their  
349 pigs the commonest practice is to check for *cysticerci* under the tongue. Many also reported  
350 muscles as the other predilection site for cysticerci because they had seen infected pork meat  
351 before. Only a quarter of the respondents knew how pigs acquire the cysticerci. There is a strong  
352 misconception that feeding pigs with maize bran (gaga) left over from beer brew caused cysticerci  
353 in pigs. This is because of the similarity in appearance between the cysticerci (mases) and the peel  
354 from maize bran. This underscores the need for more health education to improve knowledge  
355 among communities. This lack of knowledge concerning transmission of PCC is not unique to our  
356 study but was also observed in Tanzania and Burkina Faso where only 33.7% and 6.2%,  
357 respectively, of the population knew that PCC was linked to pigs consuming human faeces (27,28).  
358 Overall, respondents were better informed about PCC than HCC. This is a common finding in  
359 most lower-income and middle-income countries where people are better informed about animal  
360 health than about their own health (21,27,29,30).

361 Regarding HCC more than half (57%, 334) of the respondents had heard about it in our study area  
362 but only 1% and 6% of these were knowledgeable about its transmission and prevention  
363 respectively. Similarly, while a good number of the participants (64%) knew the location of lesions  
364 for HCC, very few knew the signs and symptoms of HCC and NCC. Similar studies in Tanzania  
365 and Uganda found low knowledge regarding the signs and symptoms of HCC and NCC as well as  
366 its transmission (21,26,29). In the case of Tanzania most respondents had never even heard of

367 HCC (21,31). Low awareness of HCC and NCC were also reported in the highly endemic areas of  
368 India and Mexico (32,33). In our case the community sensitization meetings played a role and  
369 contributed to the 39% of the population being knowledgeable about the signs and symptoms of  
370 NCC. Lack of knowledge of HCC and NCC could hinder efforts to control the most preventable  
371 cause of epilepsy in the sub-Saharan African region (6,7,34) as community awareness about a  
372 disease is important for its control (35).

373 Regarding epilepsy, the majority (more than 90%) of the participants had heard about it and more  
374 than half knew someone that had epilepsy. However, not many people knew that NCC is one of  
375 the causes of epilepsy. Only 8% of the participants responded that they knew the cause of epilepsy,  
376 but 17% of these cited witchcraft as the cause while 30% said it was caused by eating infected  
377 pork meat. Witchcraft was also cited as a cause of epilepsy in Tanzania by an even larger  
378 proportion (56%) of respondents (36). This misunderstanding with regards to the cause of epilepsy  
379 affects the choice of treatment as some would prefer to seek help from traditional healers if they  
380 suspected witchcraft as a cause. Fortunately, almost all participants reported that PWE should be  
381 taken to the hospital for treatment. A few, but significant proportion (7%) of the participants  
382 believed that epilepsy can be transmitted from one person to another through inhalation of flatus  
383 from a convulsing person or if one comes into contact with the sweat of a convulsing person. This  
384 belief that epilepsy can be transmitted from one person to another was also observed in a study  
385 conducted in a neighbouring district to our study area (17) as well as in a study conducted in  
386 Tanzania in which some respondents believed that epilepsy could be acquired if someone got into  
387 contact with saliva or froth from a person with epilepsy while having an epileptic seizure (36).  
388 These perceptions may lead to neglect of a person during a seizure as people will often fear to  
389 come into contact with a convulsing person. PWE are often stigmatized in many low-income and

390 middle-income countries including Zambia, and the effects of this stigmatization can substantially  
391 decrease quality of life of PWE and their families (37,38). Educational interventions should thus  
392 emphasize that epilepsy is not transmissible from one person to another. Though epilepsy  
393 awareness and knowledge about treatment seems not too bad in our study area, the link between  
394 epilepsy and NCC has not been established by the local communities. In addition, there are  
395 persisting knowledge gaps to be addressed especially on the aetiology and transmission of epilepsy  
396 resulting in prejudice and stigma.

397 In this study, the majority of our participants obtained knowledge of TSTC in humans and pigs  
398 through community sensitisation programs conducted by *T. solium* researchers working in these  
399 communities some two years ago. However, despite those community sensitization meetings the  
400 level of knowledge about disease transmission and prevention in the majority was rather low.

401 Although community-based TSTC health education has been shown to have an impact on HCC  
402 and PCC (39,40), more robust behavioural efforts need to be implemented to improve  
403 community's knowledge, attitudes and practices including the integration of the One Health  
404 approach. The fact that very few participants heard about human taeniosis and cysticercosis from  
405 the hospital or health facility could highlight a lack of knowledge among medical staff, as well as  
406 lack of appropriate diagnostic tools for TSTC. This lack of knowledge about TSTC infections in  
407 our study area is worrisome as it has been shown that lack of knowledge of populations about PCC  
408 and HCC leads to behaviours that facilitate the transmission and maintenance of *T. solium*  
409 infections (41,42).

410 Regarding attitudes and practices related to pig keeping and pork consumption, of the few  
411 participants that keep pigs, the majority raised their pigs through a free-range system. This is  
412 common practice within the region as it is said to be cheaper than confining the pigs in pig pens



413 (16,17). Similar barriers to pig confinement have also been reported in other studies (39,43).  
414 Among those that reported consuming pork the majority preferred boiling their pork meat.  
415 However, 3.7% of the men preferred pork that was barbequed compared to that which was boiled.  
416 Also, 8.3% of the men said they consumed pork even if they saw cyst in it. This is common practice  
417 among men that drink alcohol. The dangers of eating inadequately roasted pork, particularly while  
418 drinking alcohol, was also identified in the Lao People's Democratic Republic as a typically male  
419 risk factor requiring targeted intervention (44). There is thus a risk of *T. solium* eggs transmission  
420 from the men to the rest of the household and community as the main means of contamination  
421 remains the consumption of undercooked infected pork (43,45). Within the Eastern Province of  
422 Zambia men were found to be the most exposed to undercooked meat, translating in a higher  
423 taeniosis prevalence among them (46). With regards to sanitation and hygiene, while a good  
424 number of participants reported washing their hands always after using the toilet only 11% of the  
425 toilets had a hand washing facility (tippy tap) near to the toilet. Thus, education emphasizing the  
426 importance of maintaining hand washing stations with water and soap or ash, to prevent *T. solium*  
427 cysticercosis needs to be scaled up to reduce the risk of self-infection with *T. solium* eggs. Latrine  
428 usage, hand washing with soap and ensuring access to safe water represent behaviours that limit  
429 the burden of infectious diseases such as TSTC (47).

430 Overall, the KAP scores were very low within the Chiparamba area of Chipata district with the  
431 knowledge scores being slightly higher in comparison to attitude and practices scores. These  
432 findings reinforce the importance of increasing health education to strengthen KAP in Zambian  
433 communities. A further look at the knowledge scores revealed that males were significantly more  
434 associated with better knowledge about TSTC compared to females. This was also the case in  
435 terms of better practices observed among the males. Better knowledge among males compared to

436 females was also observed in other studies conducted elsewhere. For example, in Uganda it was  
437 found that males had better knowledge about NCC compared to females (26). Similarly, in  
438 Tanzania, it was reported that male farmers were significantly associated with better knowledge  
439 about PCC than their female counterparts (29).

440 The findings in this study are important for policy makers and all stakeholders that play a role in  
441 the control and elimination of TSTC. The poor knowledge, attitudes and practices regarding *T.*  
442 *solium* infections calls for an integrated and multisectoral approach in ensuring health education  
443 programs are developed together with affected communities and undertaken to improve awareness  
444 of this debilitating neglected tropical disease at different levels. The lack of meat inspection for  
445 slaughtered pigs and lack of knowledge regarding the importance of meat inspection requires that  
446 the community is engaged working together with the veterinary services and human health experts.  
447 Health education using a simple and meaningful health message for this complex zoonotic disease  
448 needs to be provided to many different stakeholders across disciplines and sectors as the life cycle  
449 of *T. solium* complicates the messaging (one worm causing three diseases) (48).

## 450 **Strengths and limitations**

451 Our large sample size of over 500 households included in the study and the evaluation of  
452 comprehensive knowledge about TSTC are among the strengths to our study. The other strength  
453 is that the questions were administered in face-to-face interviews to each of the selected household  
454 members by enumerators conversant with the local language (Nsenga) common to both the Chewa  
455 and the Ngoni people of the area.

456 One limitation of our study is that we used a questionnaire with pre-specified answers. Thus, to  
457 correct for guessing of answers the enumerators were trained to ask the questions without stating

458 the possible answers. The pre-specified answers also catered for the effect of using more than one  
459 enumerator during the study. Another limitation is that only one person per household was  
460 interviewed. This could have led to including respondents that were more or less knowledgeable  
461 about TSTC. The effect of this, however, could not be verified.

## 462 **Conclusion**

463 This study revealed generally poor KAP among the community of Chiparamba in Chipata district  
464 of the Eastern Province of Zambia on TSTC. This poses a serious challenge to control and  
465 elimination of *T. solium* infections. Efforts to improve knowledge on TSTC transmission, signs  
466 and symptoms, prevention and management as well as its related attitudes and practices in Zambia  
467 need to be scaled up and this should be done in a One Health approach that includes the health of  
468 humans, animals and the environment they share in order to achieve control and elimination of *T.*  
469 *solium* infections. Considering that epilepsy is very prevalent in the whole of the Eastern Province  
470 and that the link of epilepsy to the different causes including NCC is poor, suggests that health  
471 workers may need more holistic training regarding TSTC, PCC, NCC and epilepsy.

## 472 **Acknowledgements**

473 We thank the community of Chiparamba Rural Health centre catchment area who willingly offered  
474 their valuable time to participate in this study. We also wish to thank Phillip Chonya, Emmanuel  
475 Ngulube, Maxwel Masuku for their assistance with questionnaire survey data collection.

## 476 **Supporting information**

477 S1 Table. Strobe checklist

478 S1 File. Supplementary tables.pdf

479 S2 File. Household questionnaire.doc

## 480 **Funding**

481 This study was funded by the German Federal Ministry of Education and Research (BMBF) under  
482 CYSTINET-Africa grant number 81203604 (CSS) and 01KA1618 (ASW). The funder had no role  
483 in the design of the study, data collection, analysis and interpretation and in writing the manuscript.

## 484 **Availability of data and material**

485 All relevant data are within the manuscript and its supporting information files.

## 486 **Competing interests**

487 The authors declare that they have no competing interests.

## 488 **Author Contributions**

489 **Conceptualization:** Gideon Zulu, Kabemba E. Mwape, Tamara M. Welte, Isaac K. Phiri, Andrea  
490 S. Winkler.

491 **Data curation:** Gideon Zulu, Martin Simunza, Isaak K. Phiri.

492 **Formal analysis:** Gideon Zulu, Martin Simunza.

493 **Funding acquisition:** Chummy S. Sikasunge, Andrea S. Winkler.

494 **Investigation:** Gideon Zulu.

495 **Methodology:** Gideon Zulu, Kabemba E. Mwape, Tamara M. Welte, Wilborad Mutale, Isaac K.  
496 Phiri, Andrea S. Winkler.

497 **Project administration:** Gideon Zulu, Chummy S. Sikasunge.

498 **Resources:** Gideon Zulu.

499 **Software:** Gideon Zulu. Martin Simunza.

500 **Supervision:** Isaac K. Phiri, Andrea S. Winkler.

501 **Validation:** Gideon Zulu, Kabemba E. Mwape, Tamara M. Welte, Isaac K. Phiri, Andrea S.  
502 Winkler.

503 **Visualization:** Gideon Zulu, Isaac K. Phiri, Andrea S. Winkler.

504 **Writing – original draft:** Gideon Zulu.

505 **Writing – review & editing:** Kabemba E. Mwape, Tamara M. Welte, Martin Simunza, Alex  
506 Hachangu, Wilbroad Mutale, Mwelwa Chembensofu, , Chummy S. Sikasunge, Isaac K. Phiri,  
507 Andrea S. Winkler.

## 508 **References**

- 509 1. Winkler A, Richter H. Landscape analysis : management of neurocysticercosis with an  
510 emphasis on low- and middle-income countries. World Heal Organ [Internet]. 2015 [cited  
511 2018 Feb 22];65. Available from:  
512 [www.neurokopfzentrum.med.tum.de/neurologie/42b.html](http://www.neurokopfzentrum.med.tum.de/neurologie/42b.html)
- 513 2. Agaba E, Modi D, Gunduz O, Modi Z. Subcutaneous nodules of cysticercosis as a sign of  
514 asymptomatic neurocysticercosis in an HIV positive patient. Rev Soc Bras Med Trop  
515 [Internet]. 2018 Nov 1 [cited 2021 Oct 18];51(6):861–3. Available from:  
516 <http://www.scielo.br/j/rsbmt/a/CC3Bbf3Zj7ChrGrzmxXTPZK/?lang=en>
- 517 3. Tuan J, Kailani L, Ngabitsinze P, Umuganwa S, Munyaneza F, Musoni E, et al.

- 518 Disseminated cysticercosis in Rwanda—case report of a patient presenting with difficulty  
519 with walking and skin nodules. *Rwanda Med J* [Internet]. 2020 [cited 2023 Mar  
520 28];77(2):1–4. Available from: <http://www.bioline.org.br/request?rw20020>
- 521 4. Stelzle D, Schmidt V, Keller L, Ngowi BJ, Matuja W, Escheu G, et al. Characteristics of  
522 people with epilepsy and Neurocysticercosis in three eastern African countries—A pooled  
523 analysis. *PLoS Negl Trop Dis* [Internet]. 2022 Nov 7 [cited 2022 Dec  
524 8];16(11):e0010870. Available from:  
525 <https://journals.plos.org/plosntds/article?id=10.1371/journal.pntd.0010870>
- 526 5. Torgerson PR, de Silva NR, Fèvre EM, Kasuga F, Rokni MB, Zhou XN, et al. The global  
527 burden of foodborne parasitic diseases: An update [Internet]. Vol. 30, *Trends in*  
528 *Parasitology*. Elsevier Current Trends; 2014 [cited 2018 Feb 22]. p. 20–6. Available from:  
529 <https://www.sciencedirect.com/science/article/pii/S1471492213001918?via%3Dihub>
- 530 6. Mwape KE, Blocher J, Wiefek J, Schmidt K, Dorny P, Praet N, et al. Prevalence of  
531 neurocysticercosis in people with epilepsy in the Eastern province of Zambia. Flisser A,  
532 editor. *PLoS Negl Trop Dis* [Internet]. 2015 Aug 18 [cited 2018 Feb 22];9(8):e0003972.  
533 Available from:  
534 <https://journals.plos.org/plosntds/article?id=10.1371/journal.pntd.0003972>
- 535 7. Ndimubanzi PC, Carabin H, Budke CM, Nguyen H, Qian YJ, Rainwater E, et al. A  
536 systematic review of the frequency of neurocysticercosis with a focus on people with  
537 epilepsy. Preux P-M, editor. *PLoS Negl Trop Dis* [Internet]. 2010 Nov 2 [cited 2018 Feb  
538 22];4(11):e870. Available from: <http://dx.plos.org/10.1371/journal.pntd.0000870>
- 539 8. Praet N, Speybroeck N, Manzanedo R, Berkvens D, Nforninwe DN, Zoli A, et al. The  
540 disease burden of *Taenia solium* cysticercosis in Cameroon. Garcia HH, editor. *PLoS*  
541 *Negl Trop Dis* [Internet]. 2009 Mar 31 [cited 2018 Feb 22];3(3):e406. Available from:  
542 <http://dx.plos.org/10.1371/journal.pntd.0000406>
- 543 9. Carabin H, Krecek RC, Cowan LD, Michael L, Foyaca-Sibat H, Nash T, et al. Estimation  
544 of the cost of *Taenia solium* cysticercosis in Eastern Cape Province, South Africa. *Trop*  
545 *Med Int Heal* [Internet]. 2006 Jun 1 [cited 2018 Feb 22];11(6):906–16. Available from:  
546 <http://doi.wiley.com/10.1111/j.1365-3156.2006.01627.x>

- 547 10. Schantz PM. Progress in diagnosis, treatment and elimination of echinococcosis and  
548 cysticercosis. In: *Parasitology International* [Internet]. Elsevier; 2006 [cited 2018 Feb 22].  
549 p. S7–13. Available from:  
550 <https://www.sciencedirect.com/science/article/pii/S1383576905001558?via%3Dihub>
- 551 11. Gabriël S, Dorny P, Mwape KE, Trevisan C, Braae UC, Magnussen P, et al. Control of  
552 *Taenia solium* taeniasis/cysticercosis: The best way forward for sub-Saharan Africa? *Acta*  
553 *Trop* [Internet]. 2017 Jan 1 [cited 2018 Feb 22];165:252–60. Available from:  
554 <https://www.sciencedirect.com/science/article/pii/S0001706X16302133?via%3Dihub>
- 555 12. Gabriël S, Mwape KE, Phiri IK, Devleeschauwer B, Dorny P. *Taenia solium* control in  
556 Zambia: The potholed road to success. Vol. 4, *Parasite Epidemiology and Control*.  
557 Elsevier Ltd; 2019.
- 558 13. Sikasunge CS, Phiri IK, Phiri AM, Dorny P, Siziya S, Willingham AL. Risk factors  
559 associated with porcine cysticercosis in selected districts of Eastern and Southern  
560 provinces of Zambia. *Vet Parasitol* [Internet]. 2007 Jan 19 [cited 2018 Feb 22];143(1):59–  
561 66. Available from:  
562 <https://www.sciencedirect.com/science/article/pii/S0304401706004419?via%3Dihub>
- 563 14. Thys S, Mwape KE, Lefèvre P, Dorny P, Marcotty T, Phiri AM, et al. Why Latrines Are  
564 Not Used: Communities' Perceptions and Practices Regarding Latrines in a *Taenia solium*  
565 Endemic Rural Area in Eastern Zambia. Gyapong M, editor. *PLoS Negl Trop Dis*  
566 [Internet]. 2015 Mar 4 [cited 2018 Feb 22];9(3):e0003570. Available from:  
567 <http://dx.plos.org/10.1371/journal.pntd.0003570>
- 568 15. Bulaya C, Mwape KE, Michelo C, Sikasunge CS, Makungu C, Gabriel S, et al.  
569 Preliminary evaluation of Community-Led Total Sanitation for the control of *Taenia*  
570 *solium* cysticercosis in Katete District of Zambia. *Vet Parasitol* [Internet]. 2015 Jan 30  
571 [cited 2018 Feb 22];207(3–4):241–8. Available from:  
572 <https://www.sciencedirect.com/science/article/pii/S0304401714006669?via%3Dihub>
- 573 16. Thys S, Mwape KE, Lefèvre P, Dorny P, Phiri AM, Marcotty T, et al. Why pigs are free-  
574 roaming: Communities' perceptions, knowledge and practices regarding pig management  
575 and taeniosis/cysticercosis in a *Taenia solium* endemic rural area in Eastern Zambia. *Vet*

- 576 Parasitol [Internet]. 2016 Jul 30 [cited 2018 Feb 22];225:33–42. Available from:  
577 <https://www.sciencedirect.com/science/article/pii/S0304401716301947?via%3Dihub>
- 578 17. Hobbs EC, Mwape KE, Phiri AM, Mambwe M, Mambo R, Thys S, et al. Perceptions and  
579 acceptability of piloted *Taenia solium* control and elimination interventions in two  
580 endemic communities in eastern Zambia. *Transbound Emerg Dis* [Internet]. 2019 Jun  
581 24;n/a(n/a). Available from: <https://doi.org/10.1111/tbed.13214>
- 582 18. Chembensofu M, Mwape KE, Van Damme I, Hobbs E, Phiri IK, Masuku M, et al. Re-  
583 visiting the detection of porcine cysticercosis based on full carcass dissections of naturally  
584 *Taenia solium* infected pigs. *Parasites and Vectors*. 2017;10(1).
- 585 19. Mwape KE, Phiri IK, Praet N, Speybroeck N, Muma JB, Dorny P, et al. The Incidence of  
586 Human Cysticercosis in a Rural Community of Eastern Zambia. Flisser A, editor. *PLoS*  
587 *Negl Trop Dis* [Internet]. 2013 Mar 21 [cited 2018 Feb 22];7(3):e2142. Available from:  
588 <https://journals.plos.org/plosntds/article?id=10.1371/journal.pntd.0002142>
- 589 20. Charan J, Biswas T. How to calculate sample size for different study designs in medical  
590 research? [Internet]. Vol. 35, *Indian Journal of Psychological Medicine*. Indian Psychiatric  
591 Society South Zonal Branch; 2013 [cited 2023 Mar 10]. p. 121–6. Available from:  
592 </pmc/articles/PMC3775042/>
- 593 21. Nyangi C, Stelzle D, Mkupasi EM, Ngowi HA, Churi AJ, Schmidt V, et al. Knowledge,  
594 attitudes and practices related to *Taenia solium* cysticercosis and taeniasis in Tanzania.  
595 *BMC Infect Dis* [Internet]. 2022 Dec 1 [cited 2022 Dec 13];22(1). Available from:  
596 <https://pubmed.ncbi.nlm.nih.gov/35692033/>
- 597 22. Humanitarian Response. *Kobo Toolbox*. Cambridge, MA, USA. [Internet]. 2015.  
598 Available from: <https://www.kobotoolbox.org/>
- 599 23. Badran IG. Knowledge, attitude and practice the three pillars of excellence and wisdom: a  
600 place in the medical profession. *East Mediterr Heal J* [Internet]. 1995 [cited 2023 Mar  
601 17];1(1):8–16. Available from: [http://www.emro.who.int/emhj-volume-1-1995/volume-1-](http://www.emro.who.int/emhj-volume-1-1995/volume-1-issue-1/article1.html)  
602 [issue-1/article1.html](http://www.emro.who.int/emhj-volume-1-1995/volume-1-issue-1/article1.html)
- 603 24. Hollander M, Douglas AW, Erick C. *Nonparametric Statistical Methods* [Internet]. 3rd ed.  
604 John Wiley & Sons: New York, NY, USA,; 2013 [cited 2023 Mar 10]. Available from:



- 605 [https://books.google.co.in/books?hl=en&lr=&id=Y5s3AgAAQBAJ&oi=fnd&pg=PP10&ots=a\\_10k68muT&sig=TZeHkB2n7XTx0bx8lo-DLcVcpJw&redir\\_esc=y#v=onepage&q&f=false](https://books.google.co.in/books?hl=en&lr=&id=Y5s3AgAAQBAJ&oi=fnd&pg=PP10&ots=a_10k68muT&sig=TZeHkB2n7XTx0bx8lo-DLcVcpJw&redir_esc=y#v=onepage&q&f=false)
- 606
- 607
- 608 25. Gignac GE, Szodorai ET. Effect size guidelines for individual differences researchers.
- 609 *Pers Individ Dif*. 2016 Nov 1;102:74–8.
- 610 26. Alarakol SP, Bagaya BS, Yagos WO, Aginya EIO. Knowledge , attitudes and practices of
- 611 communities towards neurocysticercosis in the districts of Amuru and Gulu , Northern
- 612 Uganda. *J Parasitol Vector Biol*. 2020 Aug 19;12(December):17–28.
- 613 27. Chacha M, Yohana C, Nkwengulila G. Indigenous Knowledge, Practices, Beliefs and
- 614 Social Impacts of Porcine Cysticercosis and Epilepsy in Iringa Rural. *Health (Irvine Calif)*
- 615 [Internet]. 2014 Dec 23 [cited 2023 Mar 10];06(21):2894–903. Available from:
- 616 [http://www.scirp.org/Html/7-8203140\\_52544.htm](http://www.scirp.org/Html/7-8203140_52544.htm)
- 617 28. Ngowi H, Ozbolt I, Millogo A, Dermauw V, Somé T, Spicer P, et al. Development of a
- 618 health education intervention strategy using an implementation research method to control
- 619 taeniasis and cysticercosis in Burkina Faso. *Infect Dis Poverty* [Internet]. 2017 Jun 1
- 620 [cited 2023 Mar 10];6(1). Available from: [/pmc/articles/PMC5452375/](http://www.ncbi.nlm.nih.gov/pmc/articles/PMC5452375/)
- 621 29. Kungu JM, Dione MM, Ejobi F, Ocaido M, Grace D. Risk factors, perceptions and
- 622 practices associated with *Taenia solium* cysticercosis and its control in the smallholder pig
- 623 production systems in Uganda: A cross-sectional survey. *BMC Infect Dis* [Internet]. 2017
- 624 Jan 3 [cited 2023 Mar 7];17(1):1–9. Available from:
- 625 <https://bmcinfectdis.biomedcentral.com/articles/10.1186/s12879-016-2122-x>
- 626 30. Dahourou LD, Gbati OB, Millogo A, Dicko A, Roamba CR, Pangui LJ. Analysis of the
- 627 Knowledge, Attitudes and Practices of Populations in Four Villages of the *Boucle du*
- 628 *Mouhoun* Region (Burkina Faso) Regarding *Taenia solium* Life Cycle. *Health (Irvine*
- 629 *Calif)* [Internet]. 2018 Jan 3 [cited 2023 Apr 17];10(01):95–106. Available from:
- 630 <http://www.scirp.org/journal/PaperInformation.aspx?PaperID=81815>
- 631 31. Mwidunda SA, Carabin H, Matuja WBM, Winkler AS, Ngowi HA. A school based cluster
- 632 randomised health education intervention trial for improving knowledge and attitudes
- 633 related to *Taenia solium* cysticercosis and taeniasis in Mbulu district, northern Tanzania.

- 634 PLoS One [Internet]. 2015 Feb 26 [cited 2023 May 11];10(2):e0118541. Available from:  
635 <https://journals.plos.org/plosone/article?id=10.1371/journal.pone.0118541>
- 636 32. Alexander AM, Mohan VR, Muliyl J, Dorny P, Rajshekhar V. Changes in knowledge and  
637 practices related to taeniasis/cysticercosis after health education in a south Indian  
638 community. *Int Health* [Internet]. 2012 Sep [cited 2023 May 11];4(3):164–9. Available  
639 from: <https://pubmed.ncbi.nlm.nih.gov/24029395/>
- 640 33. Sarti E, Flisser A, Schantz PM, Gleizer M, Loya M, Plancarte A, et al. Development and  
641 evaluation of a health education intervention against *Taenia solium* in a rural community  
642 in Mexico. *Am J Trop Med Hyg* [Internet]. 1997 Feb 1 [cited 2023 May 11];56(2):127–  
643 32. Available from: <https://www.ajtmh.org/view/journals/tpmd/56/2/article-p127.xml>
- 644 34. Willingham AL, Mugarura A. *Taenia solium* tapeworms and epilepsy in Uganda. *Int*  
645 *Epilepsy News*. 2008;10–2.
- 646 35. Murrell KD. WHO/FAO/OIE guidelines for the surveillance, prevention and control of  
647 taeniosis/cysticercosis. Paris: World Health Organisation for Animal Health (OIE), 2005  
648 [Internet]. 2005 [cited 2019 May 6]. Available from: <http://www.oie.int>
- 649 36. Makasi CE, Kilale AM, Ngowi BJ, Lema Y, Katiti V, Mahande MJ, et al. Knowledge and  
650 misconceptions about epilepsy among people with epilepsy and their caregivers attending  
651 mental health clinics: A qualitative study in *Taenia solium* endemic pig-keeping  
652 communities in Tanzania. *Epilepsia open* [Internet]. 2023 Mar 20 [cited 2023 Mar 27];  
653 Available from: <https://pubmed.ncbi.nlm.nih.gov/36896648/>
- 654 37. Atadzhanov M, Haworth A, Chomba EN, Mbewe EK, Birbeck GL. Epilepsy-associated  
655 stigma in Zambia: what factors predict greater felt stigma in a highly stigmatized  
656 population? *Epilepsy Behav* [Internet]. 2010 Nov [cited 2018 Feb 20];19(3):414–8.  
657 Available from: <http://www.ncbi.nlm.nih.gov/pubmed/20851056>
- 658 38. Baskind R, Birbeck GL. Epilepsy-associated stigma in sub-Saharan Africa: The social  
659 landscape of a disease. *Epilepsy Behav* [Internet]. 2005 Aug 1 [cited 2018 Feb  
660 22];7(1):68–73. Available from:  
661 <https://www.sciencedirect.com/science/article/pii/S152550500500140X?via%3Dihub>
- 662 39. Carabin H, Millogo A, Ngowi HA, Bauer C, Dermauw V, Koné AC, et al. Effectiveness

- 663 of a community-based educational programme in reducing the cumulative incidence and  
664 prevalence of human *Taenia solium* cysticercosis in Burkina Faso in 2011–14 (EFECAB):  
665 a cluster-randomised controlled trial. *Lancet Glob Heal* [Internet]. 2018 Apr 1 [cited 2023  
666 Mar 10];6(4):e411–25. Available from: <https://pubmed.ncbi.nlm.nih.gov/29530423/>
- 667 40. Gabriël S, Mwape KE, Hobbs EC, Devleeschauwer B, Van Damme I, Zulu G, et al.  
668 Potential Elimination of Active *Taenia solium* Transmission in Africa. *N Engl J Med*  
669 [Internet]. 2020 Jul 23 [cited 2022 Jul 1];383(4):396–7. Available from:  
670 <https://www.nejm.org/doi/full/10.1056/NEJMc1909955>
- 671 41. Lescano AG, García HH, Gilman RH, Guezala MC, Tsang VCW, Gavidia CM, et al.  
672 Swine cysticercosis hotspots surrounding *taenia solium* tapeworm carriers. *Am J Trop*  
673 *Med Hyg* [Internet]. 2007 Feb 1 [cited 2023 Mar 10];76(2):376–83. Available from:  
674 <https://www.ajtmh.org/view/journals/tpmd/76/2/article-p376.xml>
- 675 42. Sorvillo F, Wilkins P, Shafir S, Eberhard M. Public health implications of cysticercosis  
676 acquired in the United States. *Emerg Infect Dis* [Internet]. 2011 [cited 2023 Mar  
677 10];17(1):1–6. Available from: [/pmc/articles/PMC3298370/](https://pubmed.ncbi.nlm.nih.gov/20811111/)
- 678 43. Lekule FP, Kyvsgaard NC. Improving pig husbandry in tropical resource-poor  
679 communities and its potential to reduce risk of porcine cysticercosis. In: *Acta Tropica*  
680 [Internet]. Elsevier; 2003 [cited 2018 Feb 22]. p. 111–7. Available from:  
681 <https://www.sciencedirect.com/science/article/pii/S0001706X03000263?via%3Dihub>
- 682 44. Bardosh K, Inthavong P, Xayaheuang S, Okello AL. Controlling parasites, understanding  
683 practices: The biosocial complexity of a One Health intervention for neglected zoonotic  
684 helminths in northern Lao PDR. *Soc Sci Med* [Internet]. 2014 Nov 1 [cited 2023 Mar  
685 11];120:215–23. Available from: <https://pubmed.ncbi.nlm.nih.gov/25261615/>
- 686 45. García HH, Gonzalez AE, Evans CAW, Gilman RH, Cysticercosis Working Group in  
687 Peru CWG in. *Taenia solium* cysticercosis. *Lancet* (London, England) [Internet]. 2003  
688 Aug 16 [cited 2018 Feb 22];362(9383):547–56. Available from:  
689 [http://www.ncbi.nlm.nih.gov/pubmed/12932389](https://pubmed.ncbi.nlm.nih.gov/12932389/)
- 690 46. Mwape KE, Phiri IK, Praet N, Muma JB, Zulu G, van den Bossche P, et al. *Taenia solium*  
691 infections in a rural area of Eastern Zambia-A community based study. Jex AR, editor.

- 692 PLoS Negl Trop Dis [Internet]. 2012 Mar 27 [cited 2018 Feb 22];6(3):1–9. Available  
693 from: <https://journals.plos.org/plosntds/article?id=10.1371/journal.pntd.0001594>
- 694 47. Aiello AE, Larson EL. What is the evidence for a causal link between hygiene and  
695 infections? [Internet]. Vol. 2, Lancet Infectious Diseases. Lancet Publishing Group; 2002  
696 [cited 2023 Mar 10]. p. 103–10. Available from:  
697 <https://pubmed.ncbi.nlm.nih.gov/11901641/>
- 698 48. Johansen MV, Trevisan C, Braae UC, Magnussen P, Ertel RL, Mejer H, et al. The vicious  
699 worm: A computer-based taenia solium education tool [Internet]. Vol. 30, Trends in  
700 Parasitology. Trends Parasitol; 2014 [cited 2023 Mar 10]. p. 372–4. Available from:  
701 <https://pubmed.ncbi.nlm.nih.gov/25017127/>
- 702

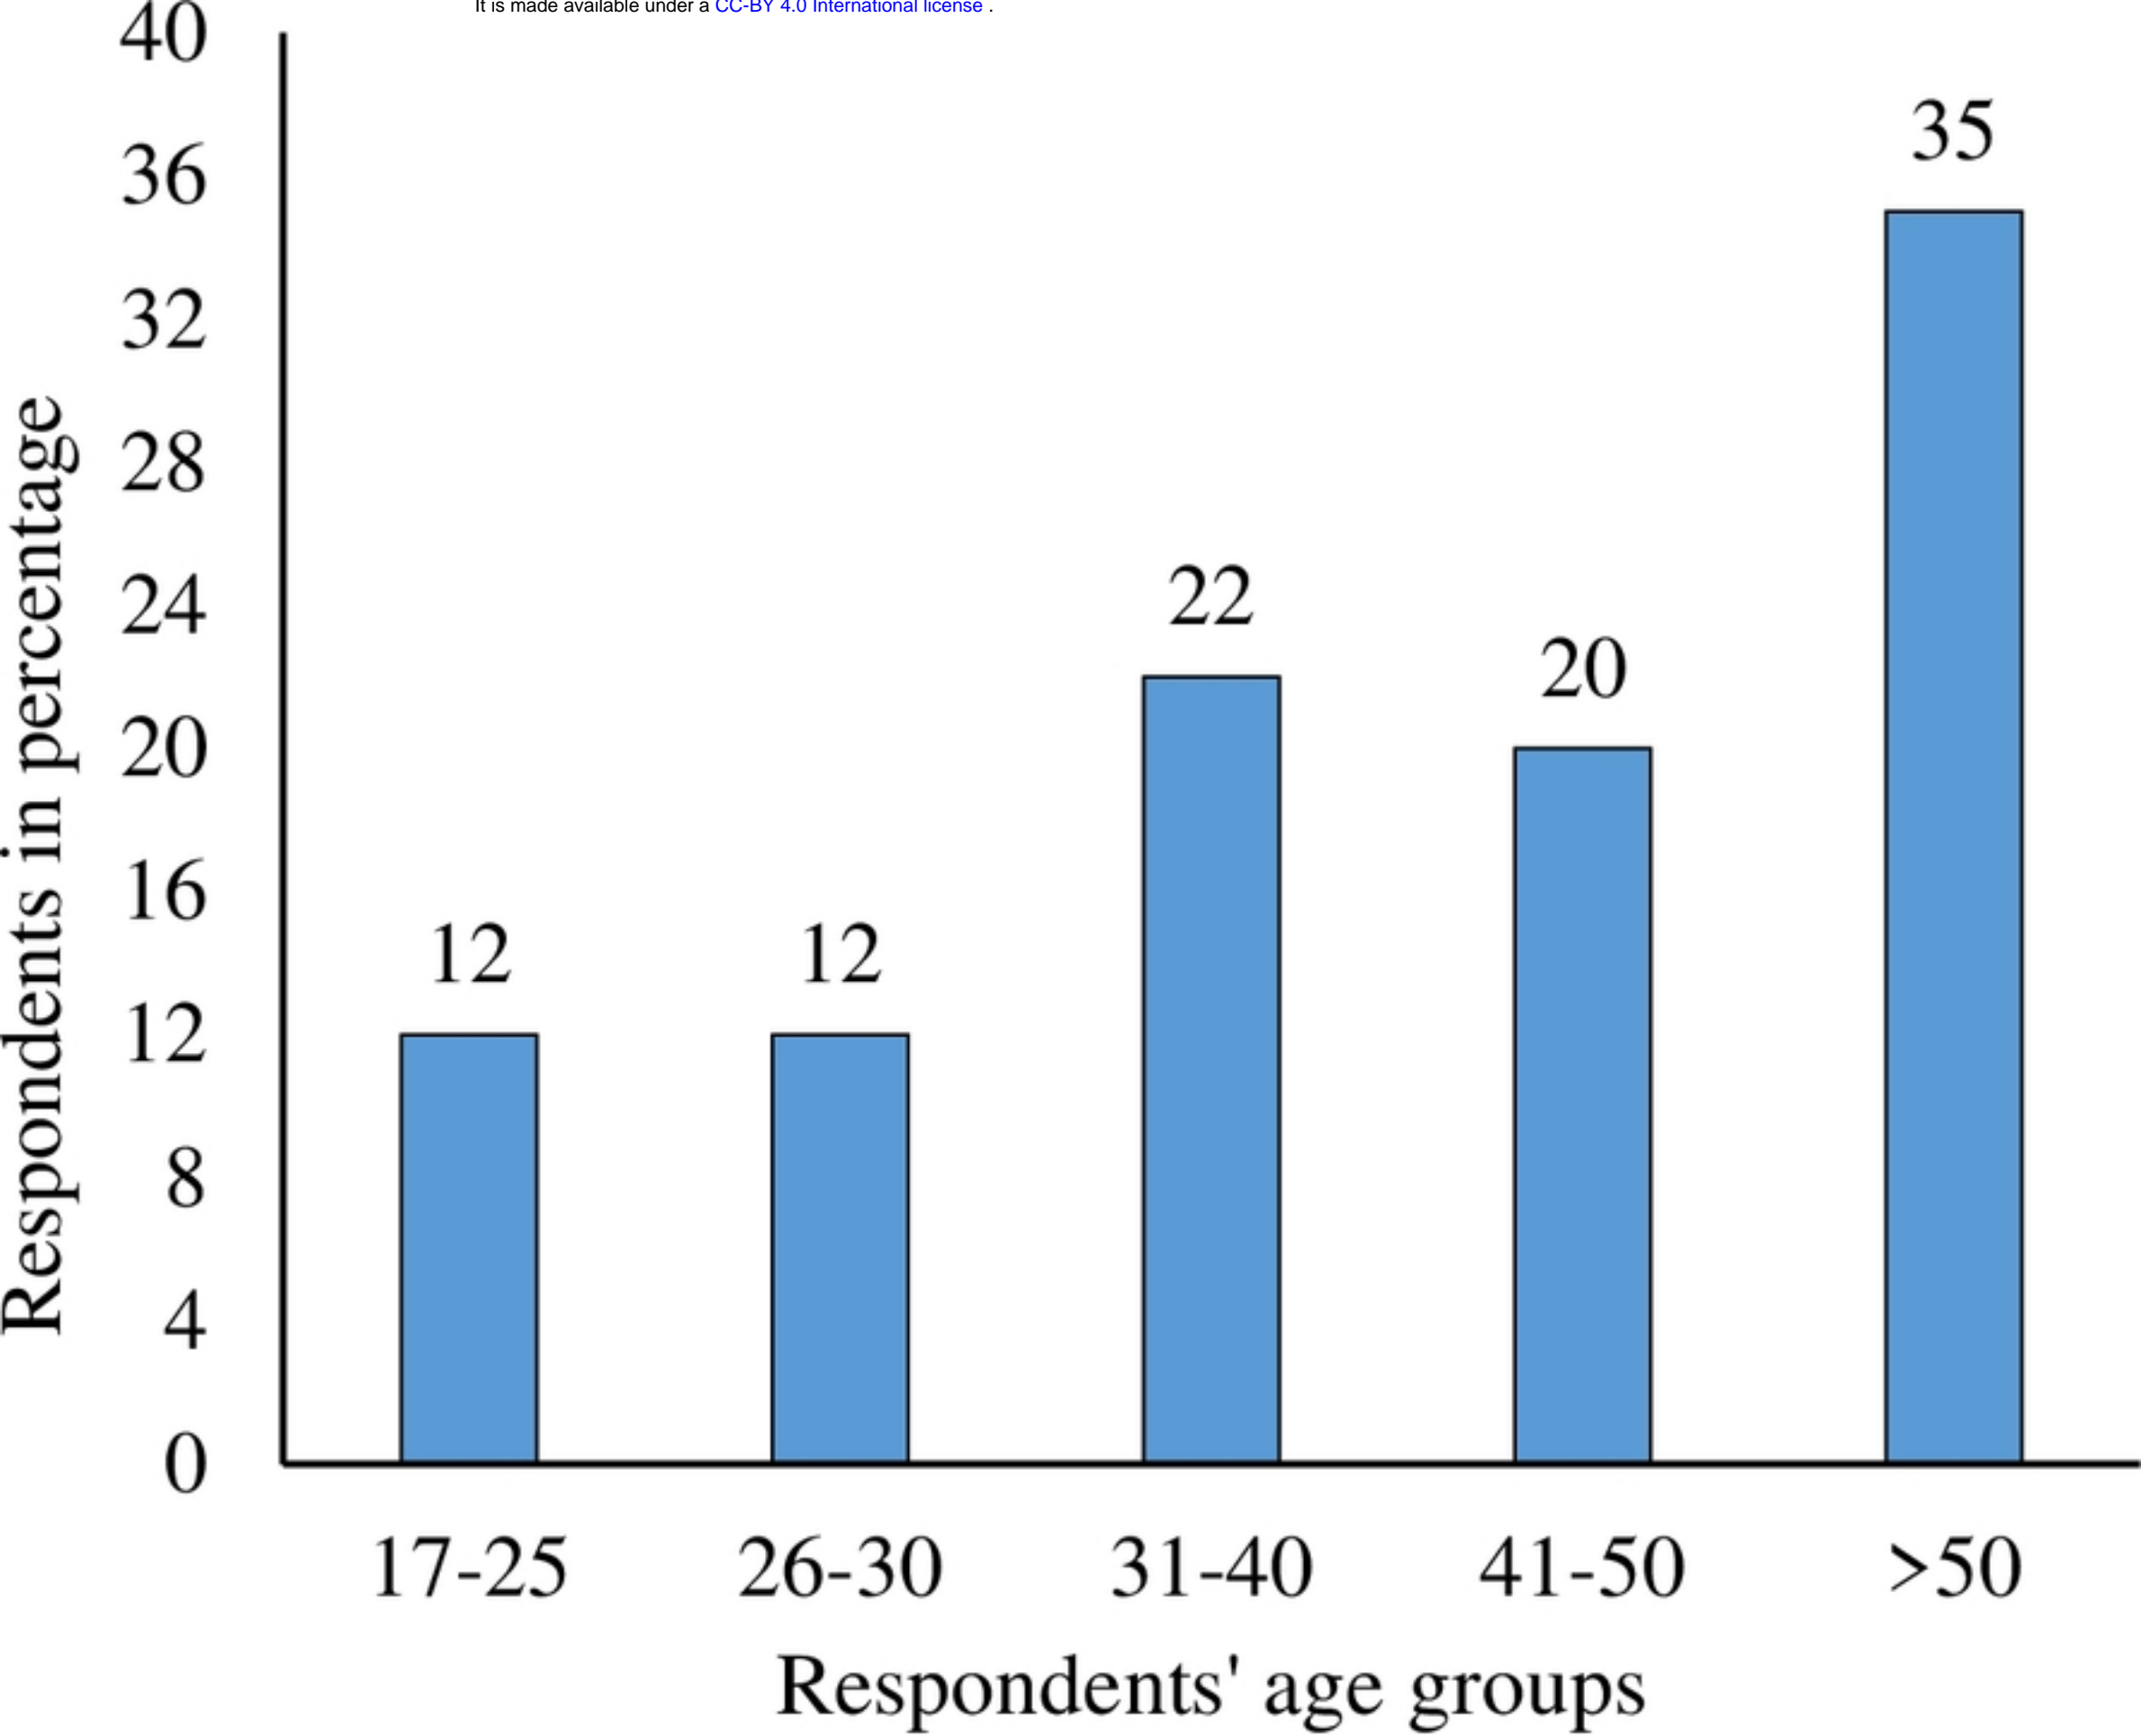

Age group classification
